# Supplementary material
Source: Springer Nature journal article supplement (https://www.springermedizin.de/resource/supplementary/12981_2013_306_MOESM1_ESM.pdf/9603570)

■ HCV/HIV co-infected patients  
■ HCV mono-infected patients

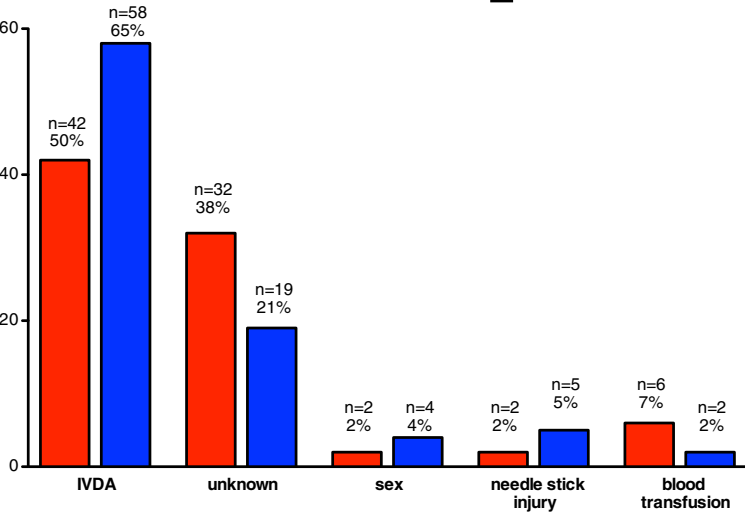

Supplement: MOESM1 [file 9603570]
